# Supplementary material
Source: publisher figshare collection journal article supplement (https://frontiersin.figshare.com/ndownloader/files/22088274)
Supplement: Supplementary file [file 22088274]

## Supplementary Material

### Supplementary Tables

**Table S1** Multiple linear regression models for systolic (SBP), diastolic (DBP) blood pressure and mean arterial pressure (MAP) in the dataset of indigenous pregnant Ngäbe-Buglé women (n= 206-207) without intestinal nematode data.

| SBP <sup>1</sup>                      | Coef. ± SE    | P       | 95% CI       | β      | Overall Model                            |
|---------------------------------------|---------------|---------|--------------|--------|------------------------------------------|
| Gestational age, wk                   | -0.006 ± 0.07 | 0.927   | -0.14, 0.13  | -0.006 | P< 0.0001<br>Adj. R <sup>2</sup> = 0.170 |
| Weight for height category            | 3.28 ± 1.26   | 0.010   | 0.78, 5.77   | 0.176  |                                          |
| Multiple nutrient supplement, tbsp./d | 1.62 ± 0.45   | <0.0001 | 0.72, 2.52   | 0.248  |                                          |
| IL17                                  | -0.20 ± 0.08  | 0.024   | -0.37, -0.02 | -0.203 |                                          |
| TNFα                                  | 0.32 ± 0.11   | 0.004   | 0.10, 0.53   | 0.263  |                                          |
| Hematocrit quantile <sup>4</sup>      | 1.28 ± 0.60   | 0.035   | 0.09, 2.46   | 0.139  |                                          |
| Scabies, presence                     | -3.86 ± 1.75  | 0.028   | -7.32, -0.41 | -0.143 |                                          |
| Urinary bacteria (+)                  | -1.94 ± 1.14  | 0.092   | -4.20, 0.32  | -0.109 |                                          |
| <i>Trichomonas</i> , presence         | -3.81 ± 1.57  | 0.016   | -6.92, -0.70 | -0.159 |                                          |
| Constant                              | 95.79 ± 3.81  | <0.0001 | 88.27, 103.3 |        |                                          |
| DBP <sup>2</sup>                      | Coef. ± SE    | P       | 95% CI       | β      | Overall Model                            |
| Gestational age, wk                   | 0.05 ± 0.06   | 0.416   | -0.07, 0.16  | 0.057  | P= 0.0001<br>Adj. R <sup>2</sup> = 0.113 |
| Urinary gravity >1020                 | 3.32 ± 1.25   | 0.009   | 0.85, 5.80   | 0.175  |                                          |
| Weight for height category            | 2.30 ± 1.05   | 0.029   | 0.23, 4.37   | 0.150  |                                          |
| Multiple nutrient supplement, tbsp./d | 0.82 ± 0.38   | 0.034   | 0.06, 1.58   | 0.152  |                                          |
| Hematocrit, quantile <sup>4</sup>     | 1.30 ± 0.50   | 0.010   | 0.31, 2.28   | 0.172  |                                          |
| <i>Trichomonas</i> , presence         | -2.22 ± 1.34  | 0.100   | -4.86, 0.42  | -0.112 |                                          |
| Vitamin D< 50 nmol/L                  | -2.03 ± 1.16  | 0.082   | -4.32, 0.26  | -0.115 |                                          |
| Constant                              | 53.07 ± 3.09  | <0.0001 | 46.97, 59.17 |        |                                          |
| MAP <sup>3</sup>                      | Coef. ± SE    | P       | 95% CI       | β      | Overall Model                            |
| Gestational age, wk                   | 0.004 ± 0.05  | 0.939   | -0.11, 0.12  | 0.005  | P< 0.0001<br>Adj. R <sup>2</sup> = 0.168 |
| Weight for height category            | 2.87 ± 0.99   | 0.004   | 0.92, 4.83   | 0.194  |                                          |
| Urinary gravity >1020                 | 3.05 ± 1.18   | 0.011   | 0.71, 5.39   | 0.167  |                                          |
| Multiple nutrient supplement, tbsp./d | 1.03 ± 0.36   | 0.005   | 0.31, 1.74   | 0.198  |                                          |
| TNFα                                  | 0.10 ± 0.06   | 0.114   | -0.02, 0.22  | 0.103  |                                          |
| Hematocrit, quantile <sup>4</sup>     | 1.34 ± 0.48   | 0.006   | 0.39, 2.29   | 0.185  |                                          |
| <i>Trichomonas</i> , presence         | -2.26 ± 1.25  | 0.072   | -4.74, 0.20  | -0.119 |                                          |
| Folic acid <10 nmol/L                 | 3.82 ± 1.27   | 0.003   | 1.31, 6.32   | 0.200  |                                          |
| Retinol-binding protein <30 mg/L      | 1.83 ± 1.22   | 0.136   | -0.58, 4.25  | 0.099  |                                          |
| Constant                              | 63.0 ± 2.9    | <0.0001 | 57.3, 68.7   |        |                                          |

<sup>1</sup> n= 206, Variance inflation factor= 1.29. Condition number= 17.73. Variables that were included but had a P>0.10: IL13 (pg/mL), presence of caries, wood smoke exposure.

<sup>2</sup> n= 207. Variance inflation factor= 1.08. Condition number= 15.72. Variables that were included but had a P>0.10: presence of *Trichomonas*, IL13 (pg/mL), taking iron supplements (y/n), hemoglobin (g/L).

<sup>3</sup> n= 206. Variance inflation factor= 1.10. Condition number= 16.35. Variables that were included but had a P>0.10: TNFα (pg/mL), retinol-binding protein <30 mg/L, vaginal yeast (+), vitamin D<50 nmol/L, urinary protein (+), hemoglobin (g/L), IL13 (pg/mL)

<sup>4</sup> Hematocrit was divided into quantiles according to its distribution in our population: <25<sup>th</sup> quantile, 25<sup>th</sup> – 50<sup>th</sup>, 50<sup>th</sup> – 75<sup>th</sup> and >75<sup>th</sup> quantiles (<33.2%, 33.2-35%, 35-36.9% and >36.9%, respectively)

**Blood pressure, pregnancy and fetal growth****Table S2** Multiple logistic regression models for elevated MAP (eMAP) and low blood pressure (SBP<100 and DBP <60 mmHg) in the dataset of indigenous pregnant Ngäbe-Buglé women (n=212), where data on intestinal nematodes were not included.

| <b>eMAP<sup>1</sup></b>               | <b>OR ± SE</b> | <b>P</b> | <b>95% CI</b> | <b>Overall Model</b>                       |
|---------------------------------------|----------------|----------|---------------|--------------------------------------------|
| Age                                   | 1.10 ± 0.04    | 0.004    | 1.03, 1.18    | P= 0.0001<br>Pseudo R <sup>2</sup> = 0.198 |
| Folic acid <10 nmol/L                 | 3.48 ± 1.84    | 0.018    | 1.23, 9.80    |                                            |
| Multiple nutrient supplement, tbsp./d | 1.28 ± 0.18    | 0.078    | 0.97, 1.68    |                                            |
| Neutrophil/Lymphocyte ratio           | 0.62 ± 0.18    | 0.099    | 0.35, 1.09    |                                            |
| IL1β, pg/mL                           | 1.11 ± 0.05    | 0.014    | 1.02, 1.21    |                                            |
| IL17, pg/mL                           | 0.93 ± 0.04    | 0.084    | 0.86, 1.01    |                                            |
| Constant                              | 0.01 ± 0.02    | 0.001    | 0.001, 0.17   |                                            |
| <b>Low blood pressure<sup>2</sup></b> | <b>OR ± SE</b> | <b>P</b> | <b>95% CI</b> | <b>Overall Model</b>                       |
| Gestational age, wk                   | 1.00 ± 0.02    | 0.935    | 0.95, 1.05    | P< 0.0001<br>Pseudo R <sup>2</sup> = 0.200 |
| Vitamin D, nmol/L                     | 0.97 ± 0.01    | 0.049    | 0.95, 0.99    |                                            |
| Field work, h/d                       | 0.83 ± 0.06    | 0.009    | 0.72, 0.95    |                                            |
| Iron supplementation, months          | 0.80 ± 0.09    | 0.061    | 0.64, 1.00    |                                            |
| Multiple nutrient supplement, tbsp./d | 0.62 ± 0.10    | 0.005    | 0.44, 0.87    |                                            |
| Folic acid <10 nmol/L                 | 0.31 ± 0.15    | 0.019    | 0.12, 0.83    |                                            |
| Scabies, presence                     | 2.23 1.02      | 0.079    | 0.91, 5.45    |                                            |
| Hematocrit, quantile <sup>3</sup>     | 0.64 ± 0.11    | 0.010    | 0.46, 0.90    |                                            |
| IL17, pg/mL                           | 0.91 ± 0.03    | 0.005    | 0.85, 0.97    |                                            |
| INFγ, pg/mL                           | 1.06 ± 0.03    | 0.026    | 1.01, 1.11    |                                            |
| Constant                              | 13.48 ± 13.3   | 0.009    | 1.94, 93.71   |                                            |

<sup>1</sup> eMAP defined as >87 mmHg between weeks 10-18, >84 mmHg in weeks 18-34, and >86 mmHg after week 34 (Reference 41).

n= 207. Variance inflation factor= 1.16. Condition number= 11.34. Variables that were included but had a P>0.10: urinary bacteria ≥2+, presence of vaginal yeast, retinol-binding protein <30 mg/L, mean corpuscular volume (fL), taking iron supplements (no=0, yes=1), weight for height classification.

<sup>2</sup> Low blood pressure defined as SBP <100 and DBP <60 mmHg (Reference 2).

n=212. Variance inflation factor= 1.39. Condition number=15.76. Variables that were included but had a P>0.10: green/leafy vegetables (portions/wk), animal source foods (portions/wk), body mass index (kg/m<sup>2</sup>).

<sup>3</sup> Hematocrit was divided into quantiles according to its distribution in our population: <25<sup>th</sup> quantile, 25<sup>th</sup> – 50<sup>th</sup>, 50<sup>th</sup> – 75<sup>th</sup> and >75<sup>th</sup> quantiles (<33.2%, 33.2-35%, 35-36.9% and >36.9%, respectively)

**Table S3** Stepwise multiple linear regression models for mean arterial pressure (MAP, mmHg) by trimester. Models were ran with and without intestinal nematode data.

| <b>MAP in the 1<sup>st</sup> trimester<sup>1</sup></b>                      | <b>Coef. ± SE</b> | <b>P</b> | <b>95% CI</b> | <b>β</b> | <b>Overall Model</b>                        |
|-----------------------------------------------------------------------------|-------------------|----------|---------------|----------|---------------------------------------------|
| Coffee, cups/d                                                              | -2.24 ± 1.03      | 0.040    | -4.38, -0.11  | -0.316   | P=0.0002<br>Adjusted R <sup>2</sup> = 0.47  |
| Red blood cell count, centiles <sup>6</sup>                                 | 6.67 ± 1.52       | <0.0001  | 3.52, 9.82    | 0.637    |                                             |
| Constant                                                                    | 64.5 ± 4.12       | <0.0001  | 56.0, 73.1    |          |                                             |
| <b>MAP in the 2<sup>nd</sup> trimester<sup>2</sup></b>                      | <b>Coef. ± SE</b> | <b>P</b> | <b>95% CI</b> | <b>β</b> | <b>Overall Model</b>                        |
| Multiple nutrient supplement, tbsp/d                                        | 1.93 ± 0.72       | 0.009    | 0.50, 3.37    | 0.266    | P<0.0001<br>Adjusted R <sup>2</sup> = 0.304 |
| Folic acid, nmol/L                                                          | -0.23 ± 0.10      | 0.022    | -0.42, -0.03  | -0.223   |                                             |
| Hematocrit, quantiles <sup>5</sup>                                          | 2.38 ± 0.77       | 0.003    | 0.85, 3.90    | 0.300    |                                             |
| Urinary gravity ≥1020                                                       | 5.10 ± 1.89       | 0.009    | 1.33, 8.87    | 0.263    |                                             |
| Urinary bacteria, +/-high power field                                       | -3.80 ± 1.50      | 0.013    | -6.78, -0.81  | -0.257   |                                             |
| Constant                                                                    | 73.64 ± 3.07      | <0.0001  | 67.53, 79.75  |          |                                             |
| <b>MAP in the 3<sup>rd</sup> trimester<sup>3</sup></b>                      | <b>Coef. ± SE</b> | <b>P</b> | <b>95% CI</b> | <b>β</b> | <b>Overall Model</b>                        |
| Folic acid <10 nmol/L                                                       | 2.85 ± 1.60       | 0.077    | -0.32, 6.02   | 0.167    | P=0.0015<br>Adjusted R <sup>2</sup> = 0.119 |
| Weight for height classification                                            | 4.37 ± 1.37       | 0.002    | 1.65, 7.09    | 0.329    |                                             |
| Multiple nutrient supplement, tbsp/d                                        | 1.35 ± 0.43       | 0.003    | 0.48, 2.21    | 0.318    |                                             |
| Constant                                                                    | 63.58 ± 3.45      | <0.0001  | 56.74, 70.43  |          |                                             |
| <b>MAP in the 3<sup>rd</sup> trimester, including nematodes<sup>4</sup></b> | <b>Coef. ± SE</b> | <b>P</b> | <b>95% CI</b> | <b>β</b> | <b>Overall Model</b>                        |
| Age, centiles                                                               | 2.94 ± 1.38       | 0.037    | 0.18, 5.71    | 0.244    | P=0.0005<br>Adjusted R <sup>2</sup> = 0.247 |
| Weight for height classification                                            | 3.49 ± 1.60       | 0.034    | 0.28, 6.70    | 0.288    |                                             |
| Multiple nutrient supplement, tbsp/d                                        | 1.15 ± 0.49       | 0.022    | 0.17, 2.13    | 0.305    |                                             |
| <i>Ascaris</i> , presence                                                   | -5.11 ± 1.78      | 0.006    | -8.78, -1.55  | -0.325   |                                             |
| Constant                                                                    | 62.07 ± 4.57      | <0.0001  | 52.91, 71.23  |          |                                             |

<sup>1</sup> n= 26. Variance inflation factor= 1.00. Condition number= 7.38. Variables that were included but had a P> 0.05: Basophil centiles, Multiple nutrient supplement (tbsp/d), weekly portions of green-leafy vegetables. Intestinal nematodes did not enter preliminary models for MAP in the first trimester.

<sup>2</sup> n= 79. Variance inflation factor= 1.04. Condition number= 8.90. Variables that were included but had a P> 0.05: IL6 (pg/mL), platelets, IL4 (pg/mL), IL13 (pg/mL), elevated CRP, presence of *Trichomonas*. *Ascaris* entered a preliminary model, but did not enter the final model (not shown).

<sup>3</sup> n= 102. Variance inflation factor= 1.04. Condition number= 9.79. Variables that were included but had a P> 0.05: TNFα (centiles)<sup>6</sup>, age (yr), vitamin D<50 nmol/L, IL1β (pg/mL), INFγ (pg/mL), urinary gravity <1020

<sup>4</sup> n= 61. Variance inflation factor= 1.07. Condition number= 11.91. Variables that were included but had a P> 0.05: INFγ (pg/mL), hookworm (presence), urinary gravity ≥1020, folic acid <10 nmol/L, vitamin D< 50 nmol/L, IL1β (centile)<sup>6</sup>, TNFα (centile)<sup>6</sup>.

<sup>5</sup> Hematocrit was divided into quantiles according to its distribution in our population: <25<sup>th</sup> quantile, 25<sup>th</sup> – 50<sup>th</sup>, 50<sup>th</sup> – 75<sup>th</sup> and >75<sup>th</sup> quantiles (<33.2%, 33.2-35%, 35-36.9% and >36.9%, respectively).

<sup>6</sup> Transformation of continuous variables into centiles (<25<sup>th</sup>, 25<sup>th</sup>-75<sup>th</sup> and >75<sup>th</sup> centiles) was performed when the continuous variable showed a non-linear association.
